# Supplementary material for: A systematic review of the processes used to link clinical trial registrations to their published results
Source: Springer Nature journal article supplement (doi:10.1186/s13643-017-0518-3), 2017-06-29
Supplement: MOESM1 [file 12499112]

**Additional file 1.** Search strategy for MEDLINE via PubMed

---

| <i>Search Terms</i> |                                                                                                                                        |
|---------------------|----------------------------------------------------------------------------------------------------------------------------------------|
| #1                  | clinicaltrials.gov[Title/Abstract]                                                                                                     |
| #2                  | ANZCTR[Title/Abstract]                                                                                                                 |
| #3                  | ICTRP[Title/Abstract]                                                                                                                  |
| #4                  | ReBec[Title/Abstract]                                                                                                                  |
| #5                  | ChiCTR[Title/Abstract]                                                                                                                 |
| #6                  | CRiS[Title/Abstract]                                                                                                                   |
| #7                  | CTRI[Title/Abstract]                                                                                                                   |
| #8                  | RPCEC[Title/Abstract]                                                                                                                  |
| #9                  | EU-CTR[Title/Abstract]                                                                                                                 |
| #10                 | DRKS[Title/Abstract]                                                                                                                   |
| #11                 | IRCT[Title/Abstract]                                                                                                                   |
| #12                 | JPRN[Title/Abstract]                                                                                                                   |
| #13                 | NTR[Title/Abstract]                                                                                                                    |
| #14                 | ISRCTN[Title/Abstract]                                                                                                                 |
| #15                 | PACTR[Title/Abstract]                                                                                                                  |
| #16                 | SLCTR[Title/Abstract]                                                                                                                  |
| #17                 | trial registry"[Title/Abstract]                                                                                                        |
| #18                 | "trial register"[Title/Abstract]                                                                                                       |
| #19                 | "trial registries"[Title/Abstract]                                                                                                     |
| #20                 | "trials registry" [Title/Abstract]                                                                                                     |
| #21                 | "registry of clinical trials" [Title/Abstract]]                                                                                        |
| #22                 | #1 or #2 or #3 or #4 or #5 or #6 or #7 or #8 or #9 or #10 or #11 or #12 or #13 or #14 or #15 or #16 or #17 or #18 or #19 or #20 or #21 |
| #23                 | "trial registration"[Title/Abstract]                                                                                                   |
| #24                 | discrepancy[Title/Abstract]                                                                                                            |
| #25                 | discrepancies[Title/Abstract]                                                                                                          |
| #26                 | consistency[Title/Abstract]                                                                                                            |
| #27                 | inconsistency[Title/Abstract]                                                                                                          |
| #28                 | #24 or #25 or #26 or #27                                                                                                               |
| #29                 | #23 and #28                                                                                                                            |
| #30                 | #22 or #29                                                                                                                             |
| #31                 | unregistered[Title/Abstract]                                                                                                           |
| #32                 | non-publication[Title/Abstract]                                                                                                        |
| #33                 | nonpublication[Title/Abstract]                                                                                                         |
| #34                 | unpublished[Title/Abstract]                                                                                                            |
| #35                 | published[Title/Abstract]                                                                                                              |
| #36                 | registered[Title/Abstract]                                                                                                             |
| #37                 | #31 or #32 or #33 or #34 or #35 or #36                                                                                                 |
| #38                 | publication[Title/Abstract]                                                                                                            |
| #39                 | clinical trial as topic [MeSH Terms]                                                                                                   |
| #40                 | #38 or #39                                                                                                                             |
| #41                 | #37 and #40                                                                                                                            |
| #42                 | #30 and #41                                                                                                                            |
| #43                 | "outcome reporting bias"[Title/Abstract]                                                                                               |
| #44                 | "selective reporting"[Title/Abstract]                                                                                                  |
| #45                 | "selective outcome reporting"[Title/Abstract]                                                                                          |
| #46                 | "missing outcome data"[Title/Abstract]                                                                                                 |
| #47                 | "publication bias"[MeSH Terms]                                                                                                         |
| #48                 | #43 or #44 or #45 or #46 or #47                                                                                                        |
| #49                 | "reporting quality"[Title/Abstract]                                                                                                    |
| #50                 | publications[Title/Abstract]                                                                                                           |
| #51                 | #49 and #50                                                                                                                            |
| #52                 | #48 or #51                                                                                                                             |
| #53                 | #42 or #52                                                                                                                             |

---
